# Supplementary material for: Sex-Linked Pheromone Receptor Genes of the European Corn Borer, Ostrinia nubilalis, Are in Tandem Arrays
Source: PubMed Central journal article supplement (PMC3081303; doi:10.1371/journal.pone.0018843), 2011-04-22

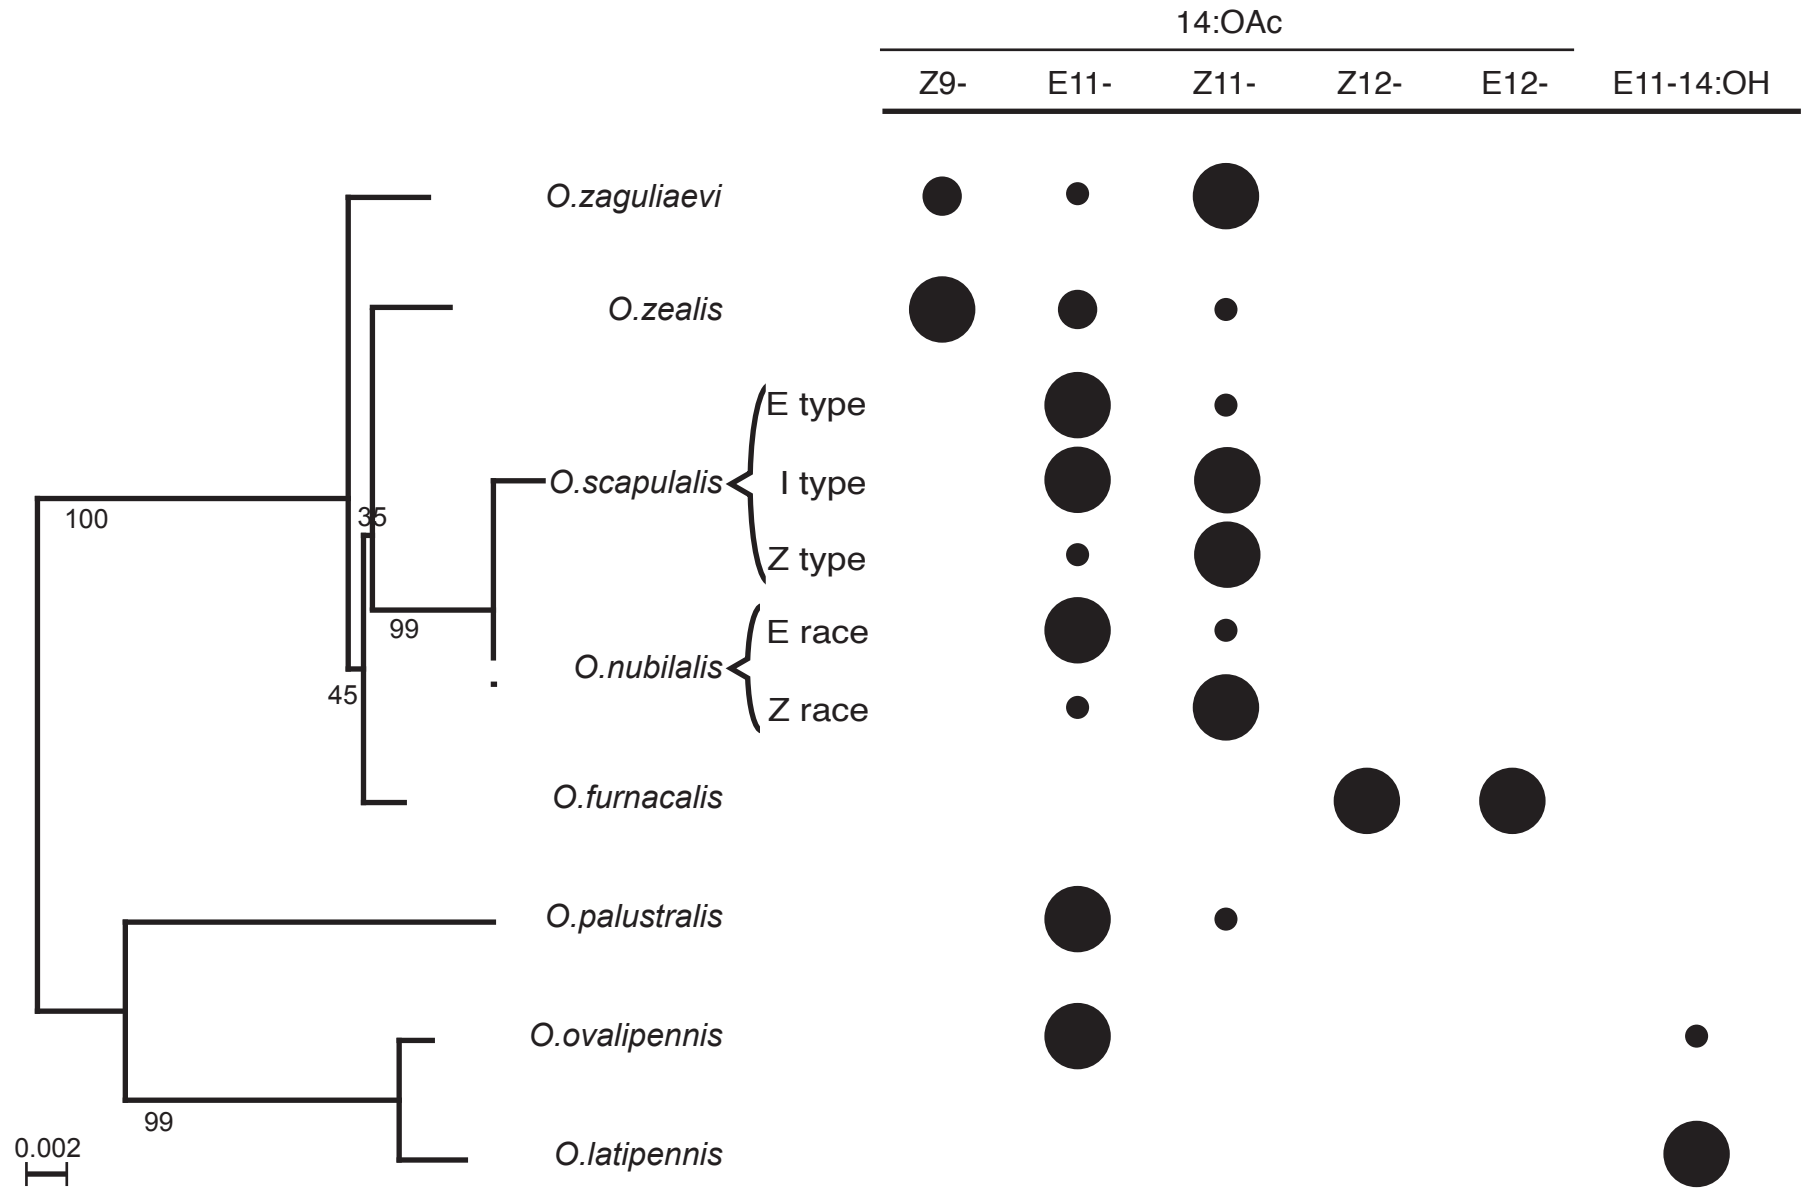

Supplement: pone.0018843.s001.pdf [file pone.0018843.s001.pdf]
